# Supplementary material
Source: HighWire-hosted journal article supplement (https://erj.ersjournals.com/content/51/6/1702697)

## SUPPLEMENTAL DATA FILES

### FIGURES

**Figure S1.** Forest plot for subgroup analysis of  $\text{VO}_{2\text{peak}}$  (in  $\text{mL}\cdot\text{kg}^{-1}\cdot\text{min}^{-1}$ ) based on AHI. The diamond reflects the 95% confidence interval of the pooled estimate of mean difference.

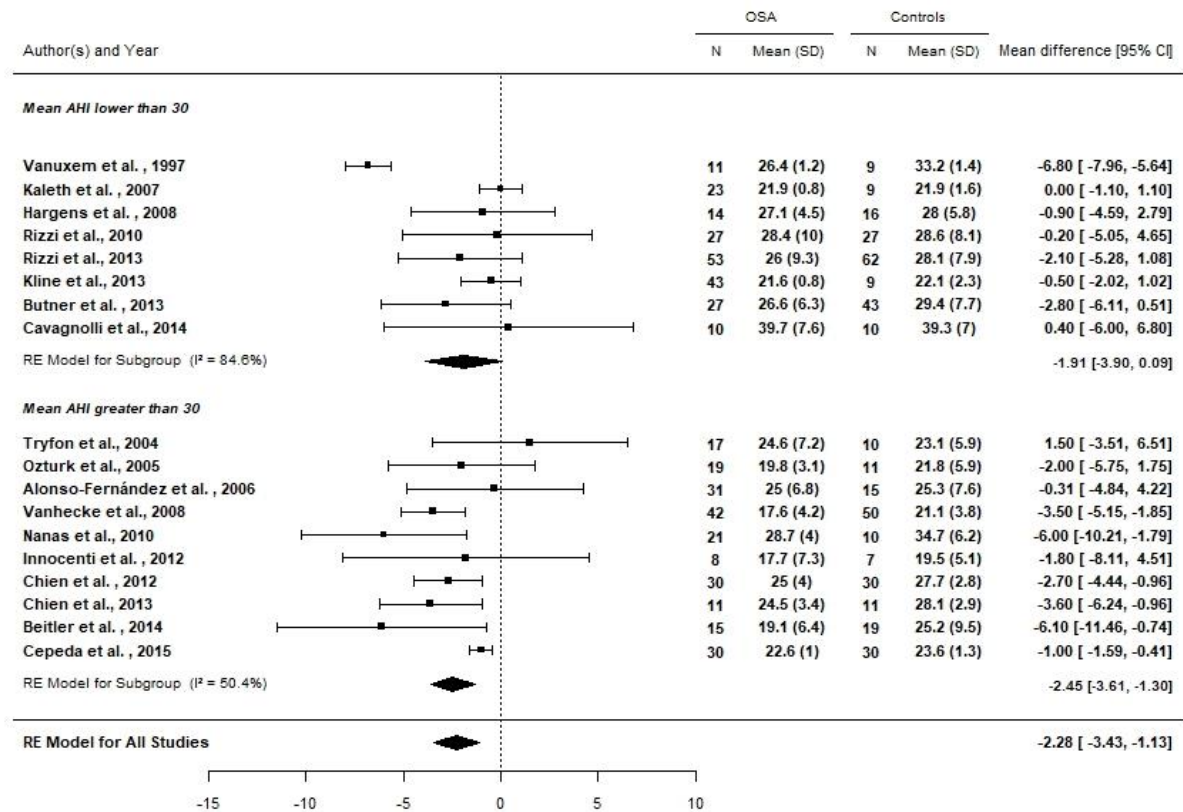

**Figure S2.** Forest plot for subgroup analysis of  $\text{VO}_{2\text{peak}}$  (in  $\text{mL}\cdot\text{kg}^{-1}\cdot\text{min}^{-1}$ ) based on age. The diamond reflects the 95% confidence interval of the pooled estimate of mean difference.

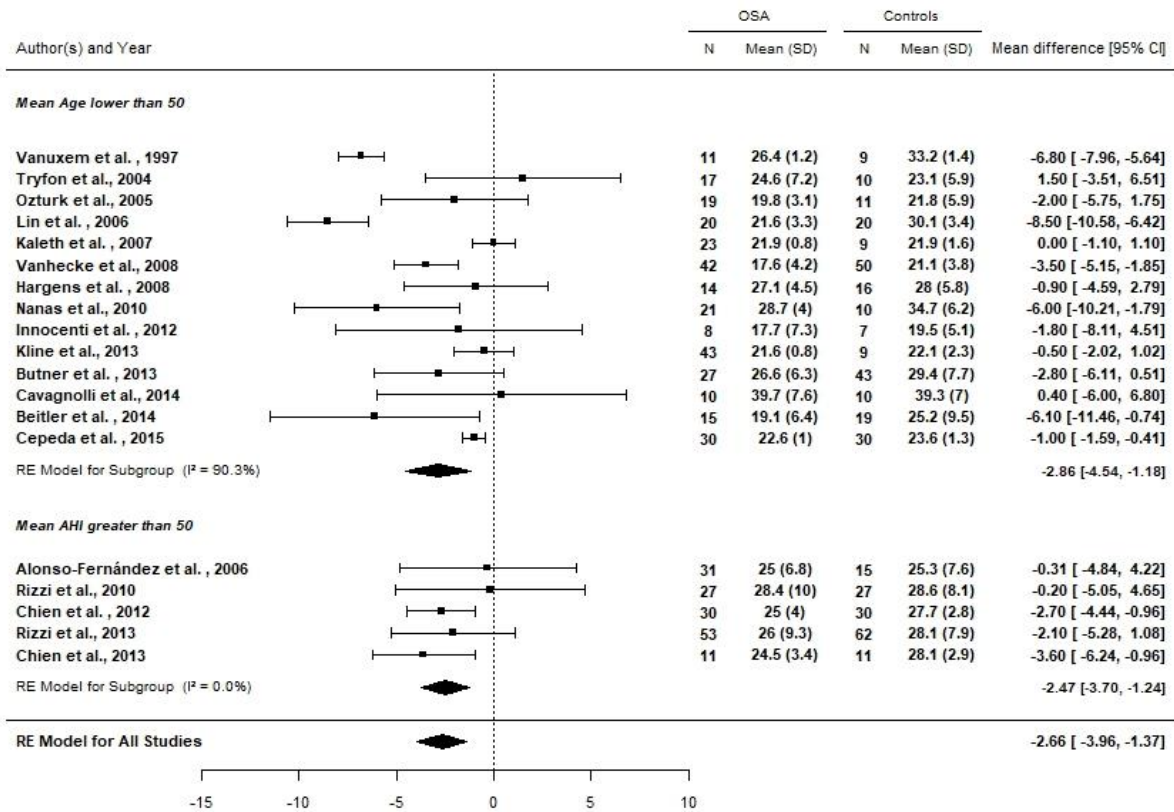

**Figure S3.** Forest plot for subgroup analysis of  $\text{VO}_{2\text{peak}}$  (in  $\text{mL}\cdot\text{kg}^{-1}\cdot\text{min}^{-1}$ ) based on BMI.

The diamond reflects the 95% confidence interval of the pooled estimate of mean difference.

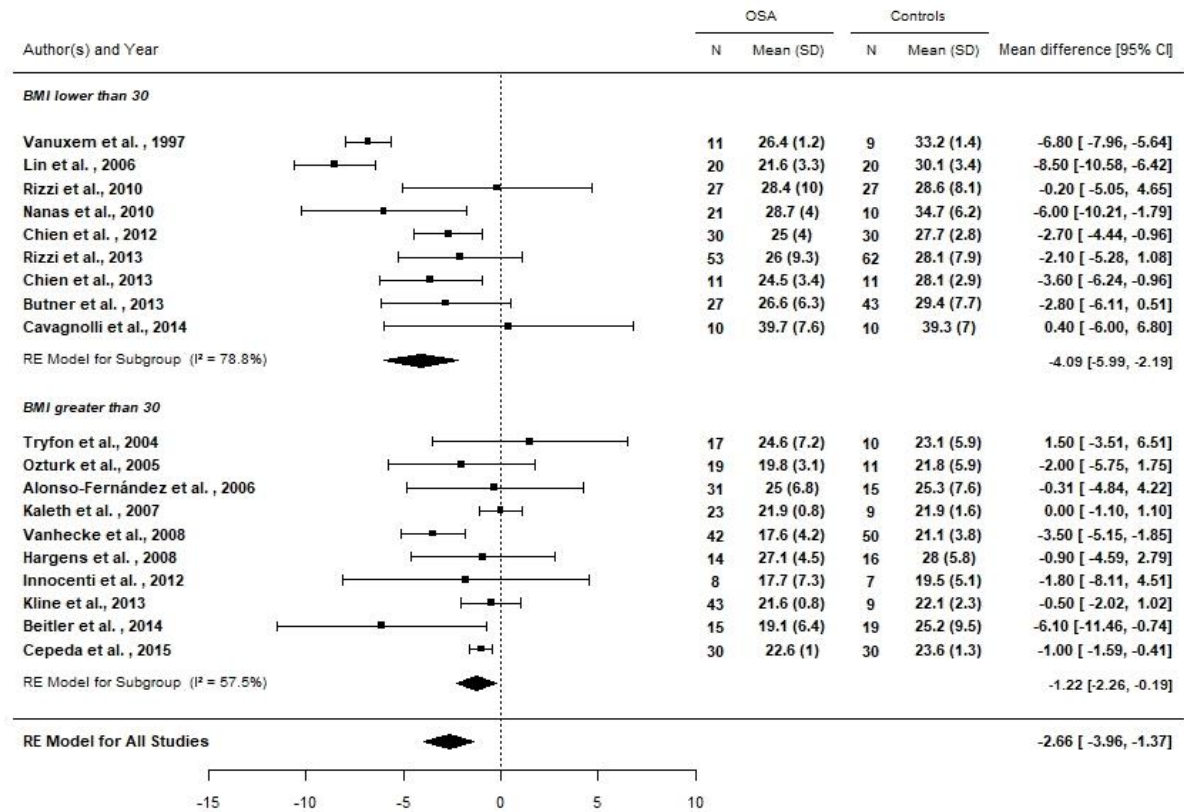

**Figure S4.** Forest plot for mean difference in peak heart rate ( $\text{beat} \cdot \text{min}^{-1}$ ) between OSA patients and controls. The diamond reflects the 95% confidence interval of the pooled estimate of mean difference.

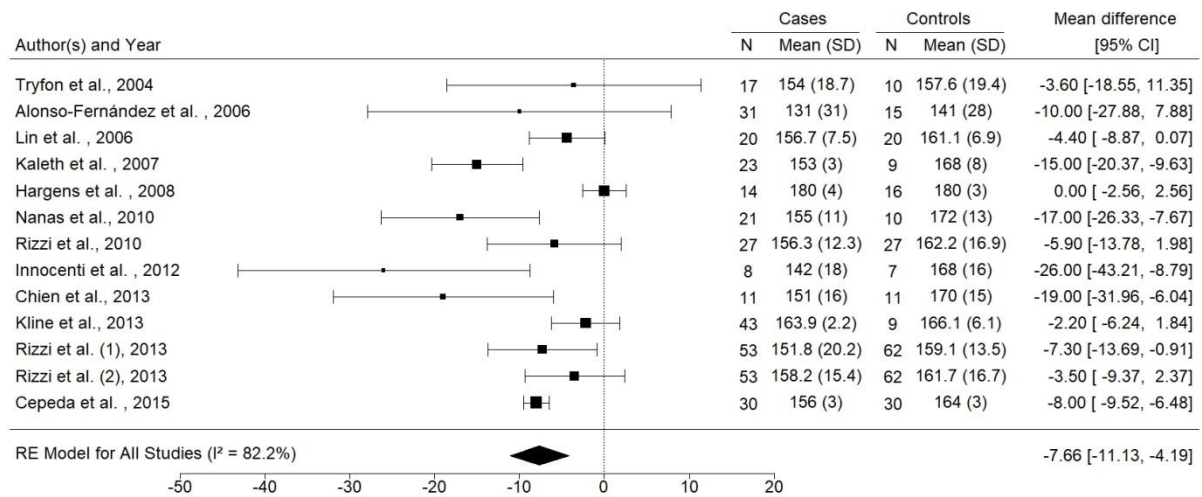

**Figure S5.** Forest plot for mean difference in peak diastolic blood pressure (mmHg) between OSA patients and controls. The diamond reflects the 95% confidence interval of the pooled estimate of mean difference.

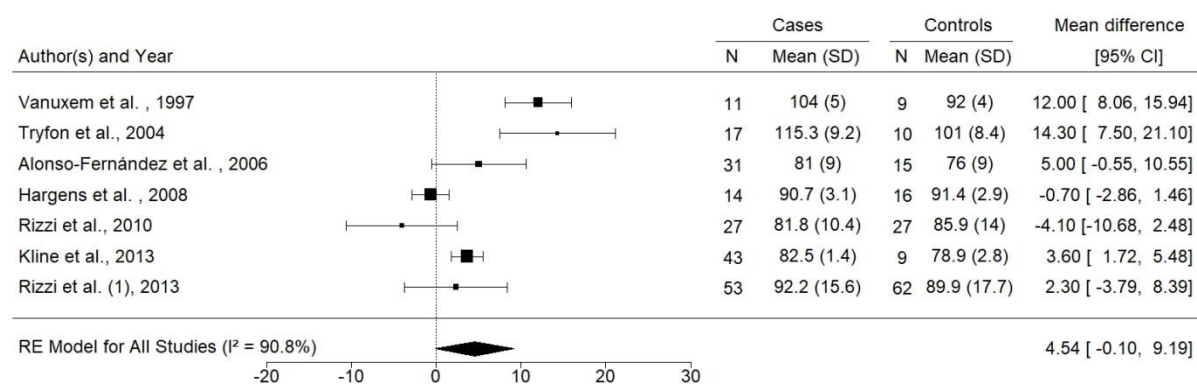

**Figure S6.** Forest plot for mean difference in peak ventilation ( $\text{L}\cdot\text{min}^{-1}$ ) between OSA patients and controls. The diamond reflects the 95% confidence interval of the pooled estimate of mean difference.

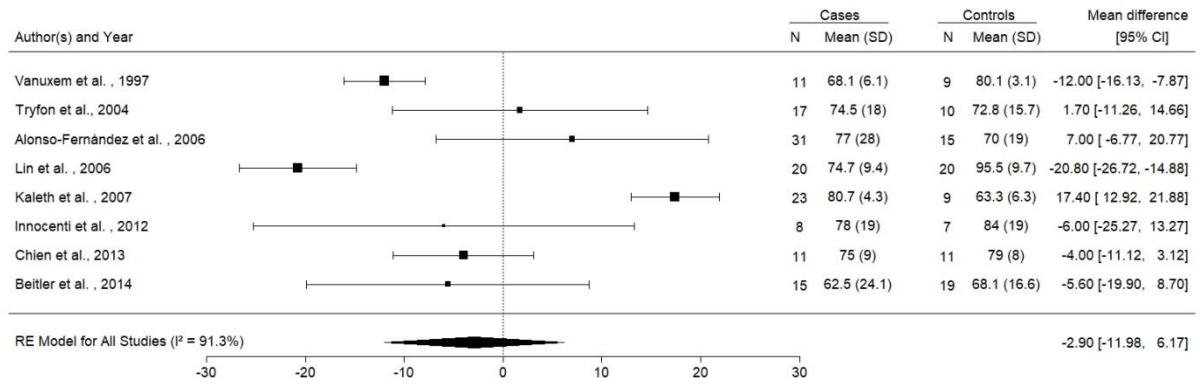

**Figure S7.** Forest plot for mean difference in peak oxygen pulse (beat  $O_2 \cdot \text{min}^{-1}$ ) between OSA patients and controls. The diamond reflects the 95% confidence interval of the pooled estimate of mean difference.

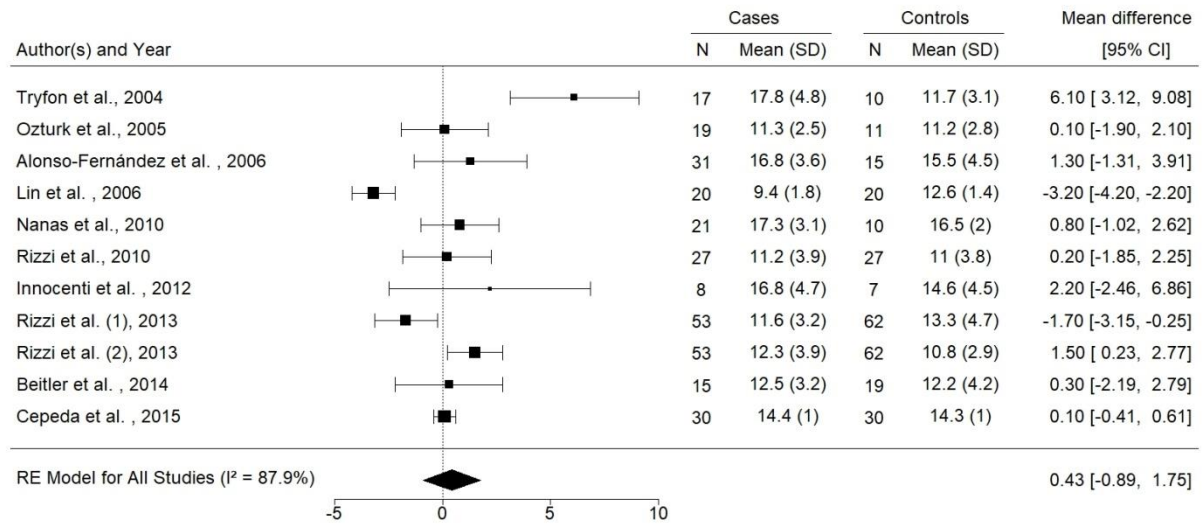

**Figure S8.** Forest plot for mean difference in peak systolic blood pressure (mmHg) between OSA patients and controls. The diamond reflects the 95% confidence interval of the pooled estimate of mean difference.

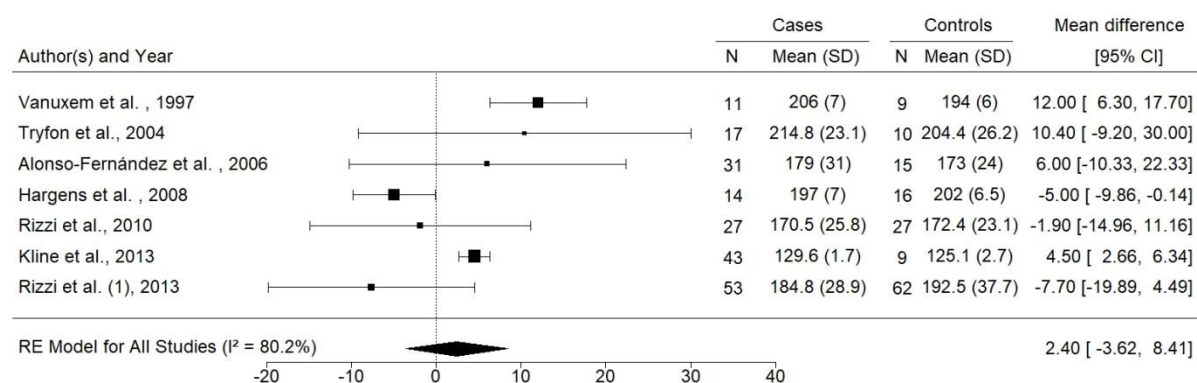



**Figure S9.** Quality assessment analysis for  $\text{VO}_{2\text{peak}}$  in  $\text{mL}\cdot\text{kg}^{-1}\cdot\text{min}^{-1}$

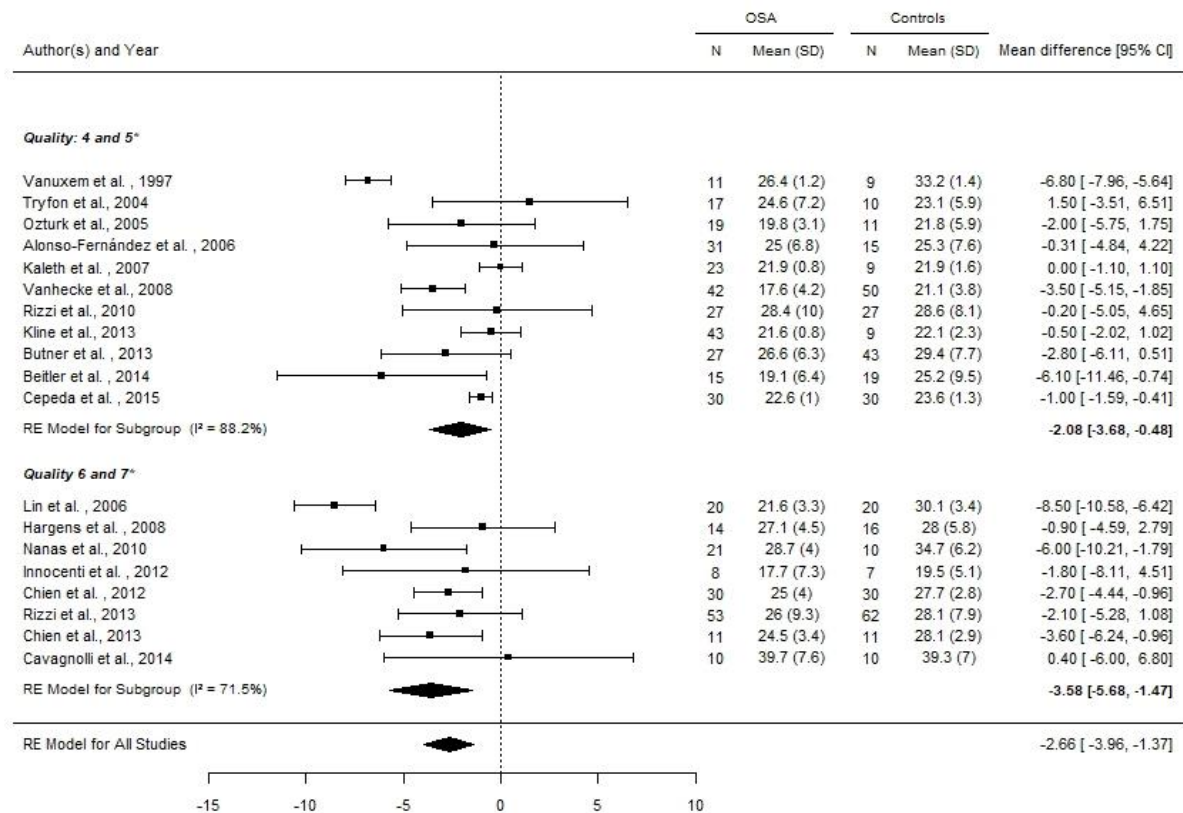

**Figure S10.** Funnel plot for  $\text{VO}_{2\text{peak}}$  in  $\text{mL}\cdot\text{kg}^{-1}\cdot\text{min}^{-1}$

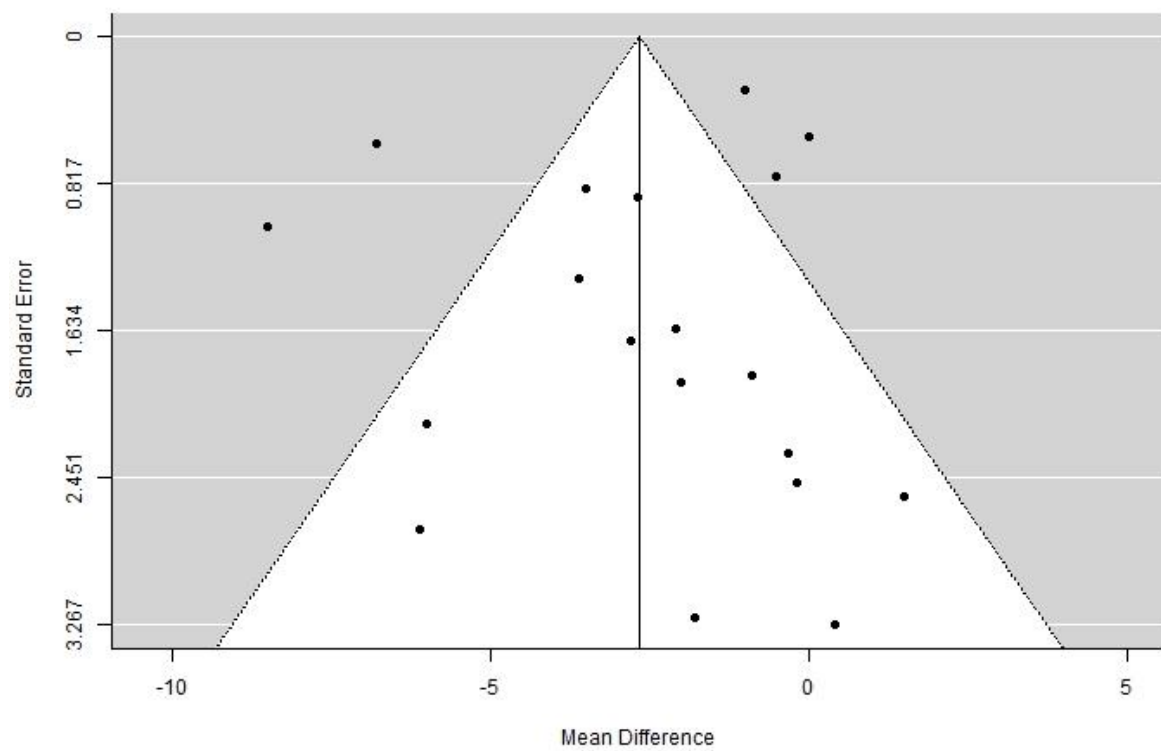

**Figure S11.** Forest plot for mean difference in BMI ( $\text{kg}/\text{m}^2$ ) between OSA patients and controls. The diamond reflects the 95% confidence interval of the pooled estimate of mean difference.

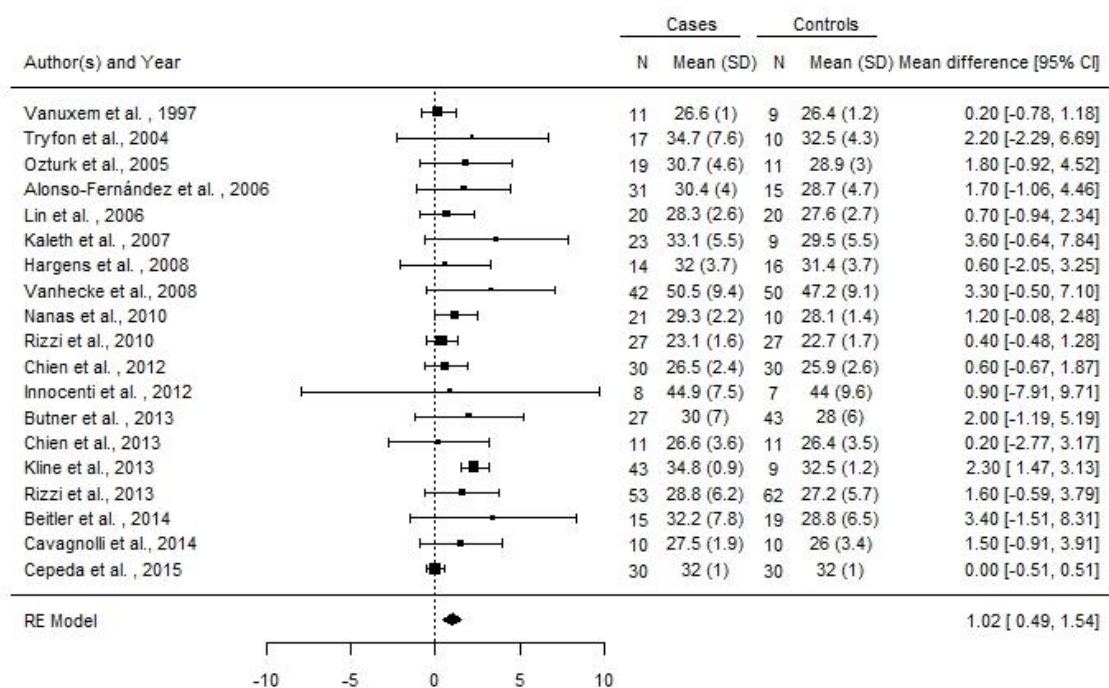

Supplement: inline-supplementary-material-2 [file inline-supplementary-material-2.pdf]
